# Supplementary material for: Real-time visualization of butyrylcholinesterase activity using a highly selective and sensitive chemiluminescent probe
Source: Royal Society of Chemistry journal article supplement (doi:10.1039/d3tb01022h), 2023-01-01
Supplement: d3tb01022h1.pdf [file d3tb01022h1.pdf]

## Supporting Information

### Real-time visualization of butyrylcholinesterase activity using a highly selective and sensitive chemiluminescent probe

Alperen Acari,<sup>a1</sup> Toghrul Almammadov,<sup>b,c1</sup> Musa Dirak,<sup>b</sup> Goktug Gulsoy,<sup>b</sup> and Safacan Kolemen<sup>a,b,d\*</sup>

<sup>a</sup>Koç University Research Center for Translational Medicine (KUTTAM), 34450 Istanbul, Türkiye

<sup>b</sup>Koç University, Department of Chemistry, 34450 Istanbul, Türkiye

<sup>c</sup>University of Zurich, Department of Chemistry, Winterthurerstrasse 190, 8057 Zurich, Switzerland

<sup>d</sup>Koç University Surface Science and Technology Center (KUYTAM), 34450 Istanbul, Türkiye

<sup>1</sup>*These authors contributed equally.*

## 1. Materials and Instruments

All commercially available reagents were used without further purification unless otherwise noted. Butyrylcholinesterase from horse serum (C7512) 9-Amino-1,2,3,4-tetrahydroacridine hydrochloride hydrate (Tacrine - A79922) were purchased from Sigma-Aldrich. Anhydrous solvents were obtained through 4 Å molecular sieve, anhydrous THF was obtained through the Mbraun MBSP55 solvent drying system. The inert atmosphere was obtained by argon.  $^1\text{H}$  NMR and  $^{13}\text{C}$  NMR spectra were recorded at room temperature on Bruker Avance III Ultrashield (500 MHz) spectrometer in  $\text{CDCl}_3$  with tetramethylsilane (TMS) as an internal standard. Coupling constants (J values) are given in Hz and chemical shifts are reported as parts per million (ppm). Splitting patterns are designated as s (singlet), d (doublet), t (triplet), q (quartet), and m (multiplet). NMR spectra were processed with MestReNova program. Column chromatography was performed by using thick-walled glass columns and silica Gel 60 (Merck 230-400 mesh). Thin layer chromatography (TLC Merck Silica Gel 60 F254) was performed by using commercially prepared 0.25 mm silica gel plates and visualization was provided by UV lamp. Mass analyses were performed with Waters Vion QTOF mass spectrometer. The relative proportions of solvents in chromatography solvent mixtures refer to the volume:volume ratio. Fluorescence spectra were acquired on Agilent Cary Eclipse spectrophotometer. Luminescence measurements were collected by a Biotek Synergy H1 MF microplate reader. Confocal microscopy images were taken by Leica DMI8 SP8 Inverted Confocal Microscope. *In vivo* imaging was performed by using Perkin Elmer IVIS Lumina Series III imaging system.

## 2. Optical Measurements

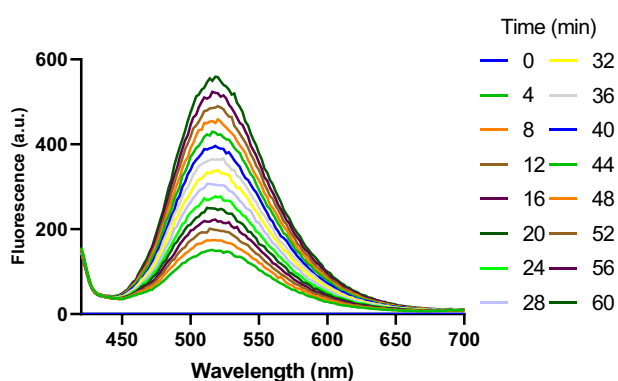

Figure S1. Time-dependent fluorescence spectra of BCC (10  $\mu\text{M}$ ) upon addition of 20 U/mL BChE in PBS (1% DMSO, pH 7.4) ( $\lambda_{\text{ex}} = 400$  nm, slit width 10/10).

### 3. HR-MS spectrum of BCC and the resulting benzoate

A)

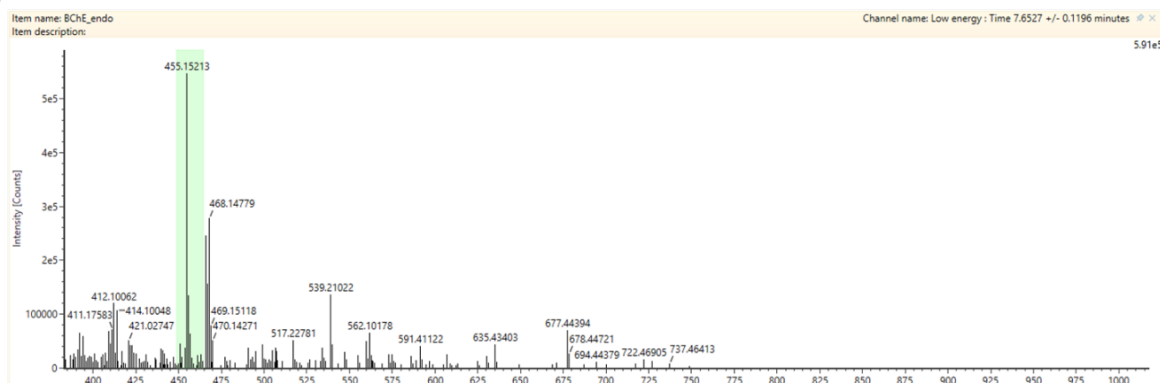

B)

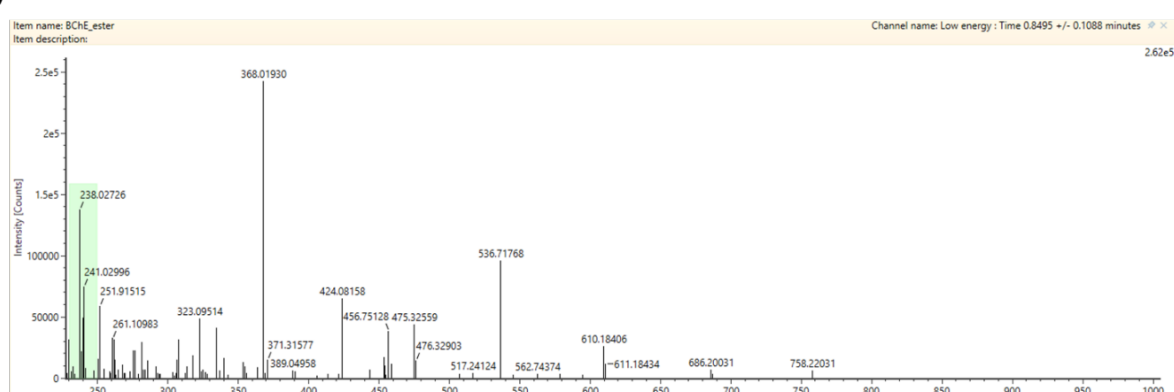

Figure S2. Mass Spectroscopy of (A) BCC and (B) the resulting (benzoate) upon addition of BChE. Calculated: 238.02710, found: 238.02726 [M+H]<sup>+</sup>.

### 4. Detection of the Chemiluminescence Signal in Solution

All measurements were done in 1% DMSO PBS at pH 7.4 by using Biotek Synergy H1 MF microplate reader.

#### Detection Limit:

The detection limit was calculated by using the “ $3 * \sigma / k$ ” formula, where  $\sigma$  is the standard deviation of the chemiluminescent signal of BCC (n=6) and the k is the slope of the enzymatic activity calibration curve (Figure S3).

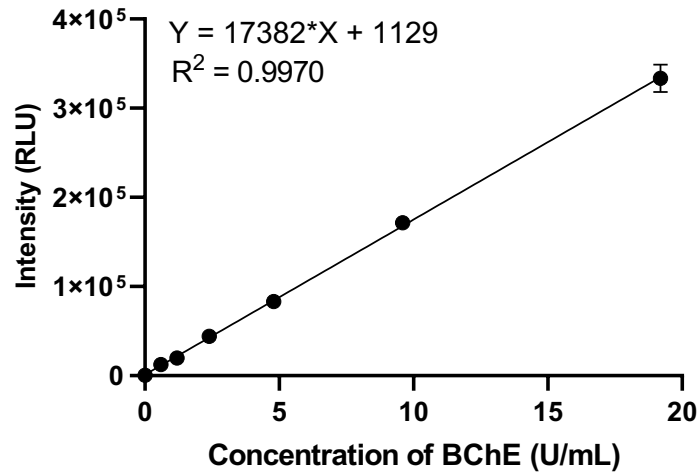

Figure S3. Calibration curve of the chemiluminescent signal intensity (at  $t = 9$  min).

Inhibition efficacy and inhibition coefficient:

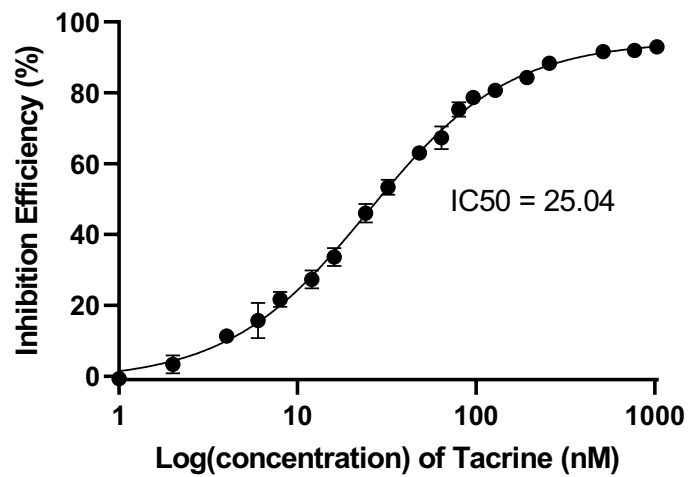

Figure S4. Tacrine concentration dependent inhibition of 2.4 U/mL BChE when treated with  $10 \mu\text{M}$  BCC in PBS (1% DMSO, pH 7.4).

## 5. Cell culture Studies

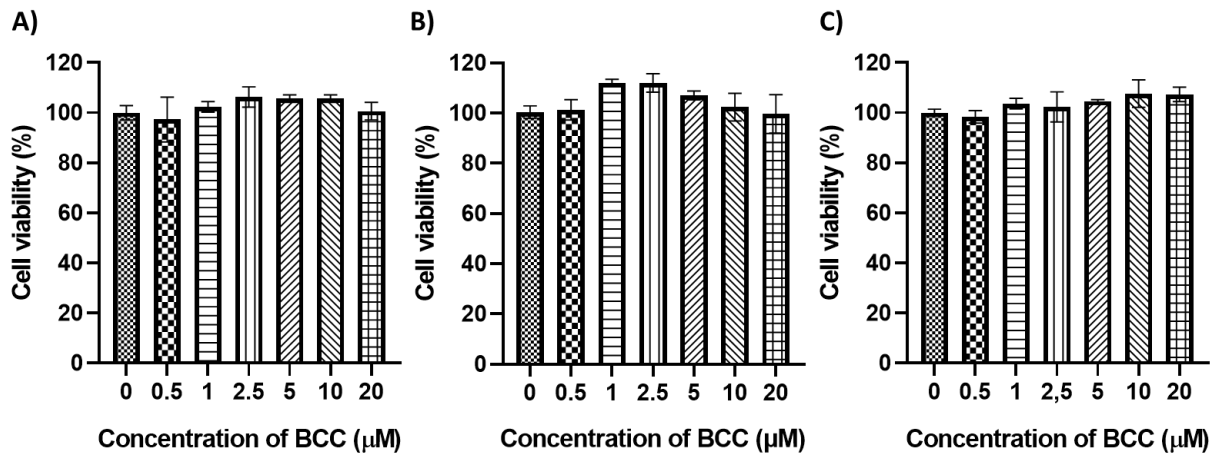

Figure S5. Cell viability of A) HEK293T, B) HepG2, C) SH-SY5Y upon incubating with BCC. Results were obtained from CellTiter-Glo® Luminescent Cell Viability Assay.

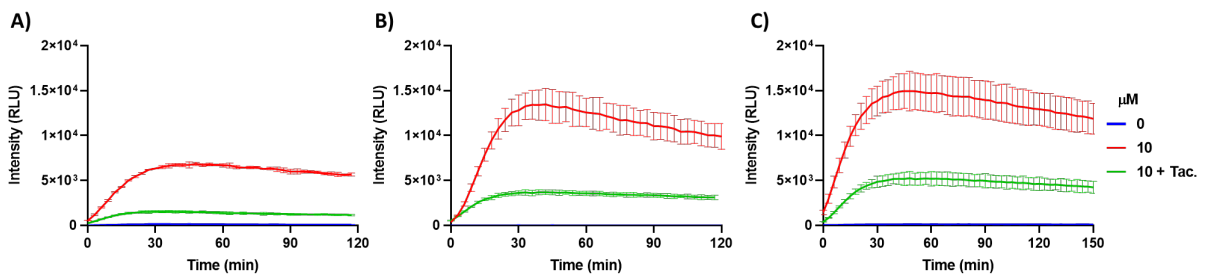

Figure S6. Time- and concentration-dependent luminescence intensity of BCC before and after Tacrine ( $50 \mu\text{M}$ ) incubation for 1 hour. A) HEK293T, B) HepG2, C) SH-SY5Y.

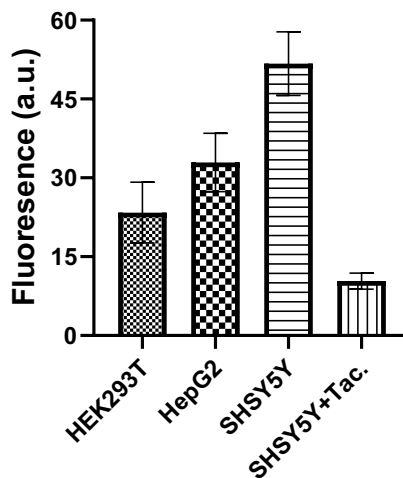

Figure S7. The fluorescence intensity of BCC ( $10 \mu\text{M}$ ) in different cell lines upon 2 hours of incubation.

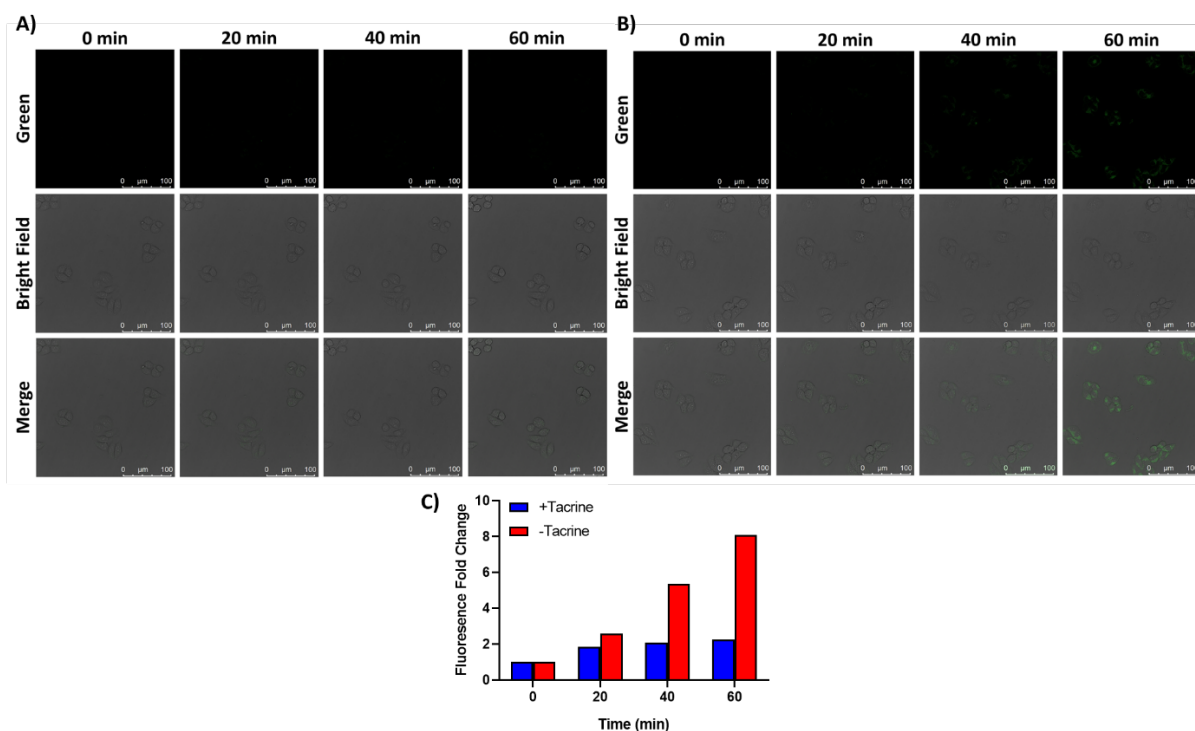

Figure S8. Time-dependent confocal images of SH-SY5Y cells treated with BCC (10  $\mu\text{M}$ ): (A) with Tacrine (50  $\mu\text{M}$ ) incubation for 1 hour and (B) without Tacrine. (C) Fold change of fluorescence signal.  $\lambda_{\text{ex}}=405\text{ nm}$  /  $\lambda_{\text{em}}=500\text{-}600\text{ nm}$ .

## 6. Previous Literature:

Table S1. A comparison of published fluorescence probes for the detection of BChE.

| Name       | Detection Limit | Type        | <i>In vivo</i> Applicability                                                  | References                                                   |
|------------|-----------------|-------------|-------------------------------------------------------------------------------|--------------------------------------------------------------|
| BChE-FP    | N/A             | Fluorophore | N/A                                                                           | Chem. Commun. <b>2017</b> , 53, 3952                         |
| BChE-NIRFP | N/A             | Fluorophore | Zebra Fish Model<br>Alzheimer's disease model via prefrontal cortex injection | ACS. Sens. <b>2018</b> , 3, 2118                             |
| DCPDA      | 0.06 U/mL       | Fluorophore | N/A                                                                           | Analyst. <b>2019</b> , 144, 559                              |
| DSC        | 0.0012 U/mL     | Fluorophore | N/A                                                                           | Chem. Commun. <b>2019</b> , 55, 14574                        |
| IPAN       | 0.0117 U/mL     | Fluorophore | Zebra Fish Model                                                              | Anal. Chem. <b>2020</b> , 92, 13405                          |
| CyCICP     | 0.00375 U/mL    | Fluorophore | N/A                                                                           | Talanta. <b>2020</b> , 219, 121278                           |
| BChE-NBD   | 29 ng/mL        | Fluorophore | Mouse Liver Imaging                                                           | Sensors and Actuators B: Chemical. <b>2021</b> , 330, 129348 |

|          |               |                               |                                                                                                 |                                                                        |
|----------|---------------|-------------------------------|-------------------------------------------------------------------------------------------------|------------------------------------------------------------------------|
| P1       | 0.8 U/mL      | Fluorophore                   | Healthy Mouse Brain Imaging via prefrontal cortex injection                                     | ACS. Sens. <b>2021</b> , 6, 1138                                       |
| P1       | 1080 ng/mL    | Fluorophore                   | Alzheimer's disease model via prefrontal cortex injection                                       | Anal. Chem. <b>2021</b> , 93, 11337                                    |
| W1       | 77 ng/mL      | Ratiometric Fluorophore (ACQ) | N/A                                                                                             | Dyes Pigm. <b>2022</b> , 197, 109874.                                  |
| TB-BChE  | 39.24 ng/mL   | Ratiometric Fluorophore (AIE) | Nonalcoholic Fatty Liver Model<br>Healthy Mouse Model                                           | J. Mater. Chem. B, <b>2022</b> , 10, 4254                              |
| DX-2     | 0.08 U/mL     | Fluorophore                   | Tumor Model                                                                                     | Anal. Chim. Acta, <b>2022</b> , 1235, 340540                           |
| Chy-1    | 0.12 ng/mL    | Fluorophore                   | Alzheimer's disease model via prefrontal cortex injection<br>Healthy Mouse Model<br>Tumor Model | Anal. Chem. <b>2022</b> , 94, 39, 13498-13506                          |
| HBT-BChE | 0,000754 U/mL | Fluorophore (ESIPT-AIEE)      | Zebra Fish Model                                                                                | Spectrochim. Acta - A: Mol. Biomol. Spectrosc <b>2023</b> , 287 122044 |
| BCC      | 0.015 U/mL    | Chemiluminescence             | Healthy Mouse Model<br>Tumor Model                                                              | This Work                                                              |

## 7. NMR Spectra

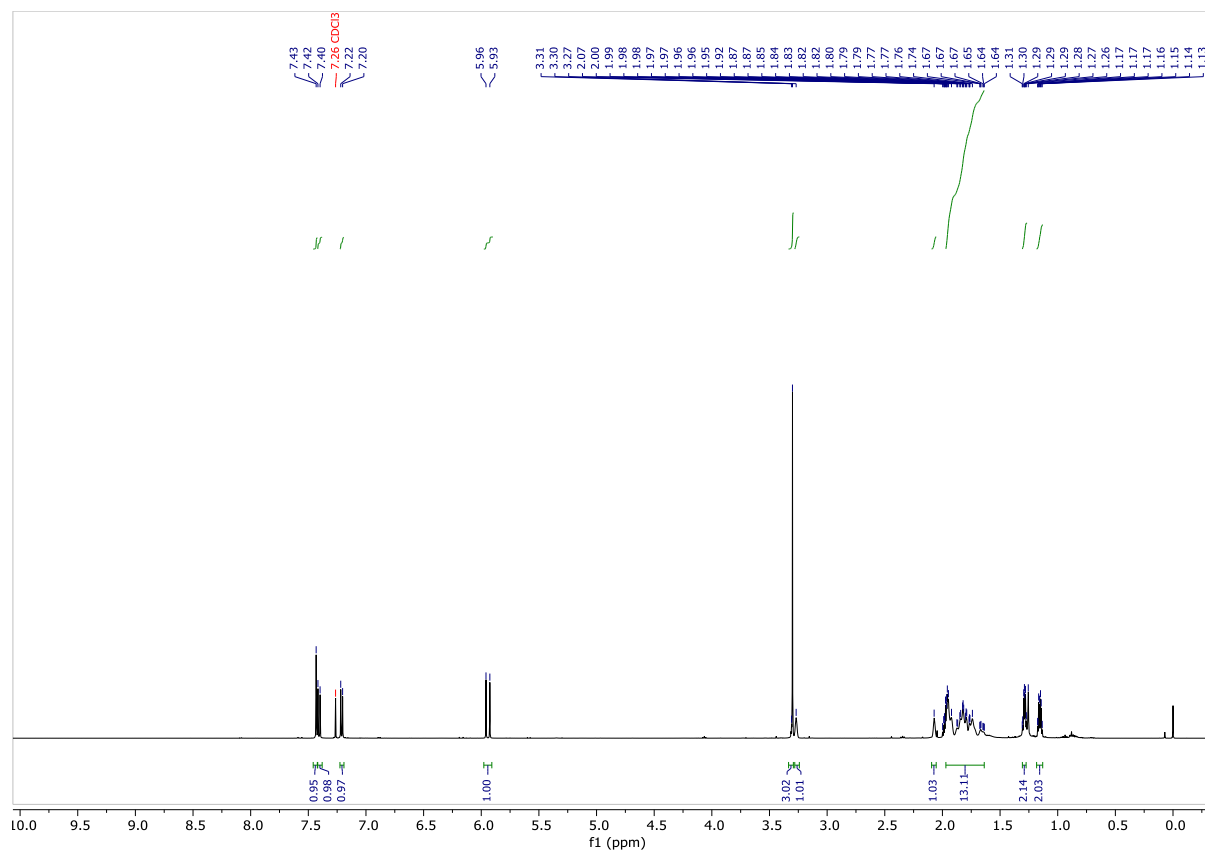

Figure S9. <sup>1</sup>H NMR spectrum of **2**.

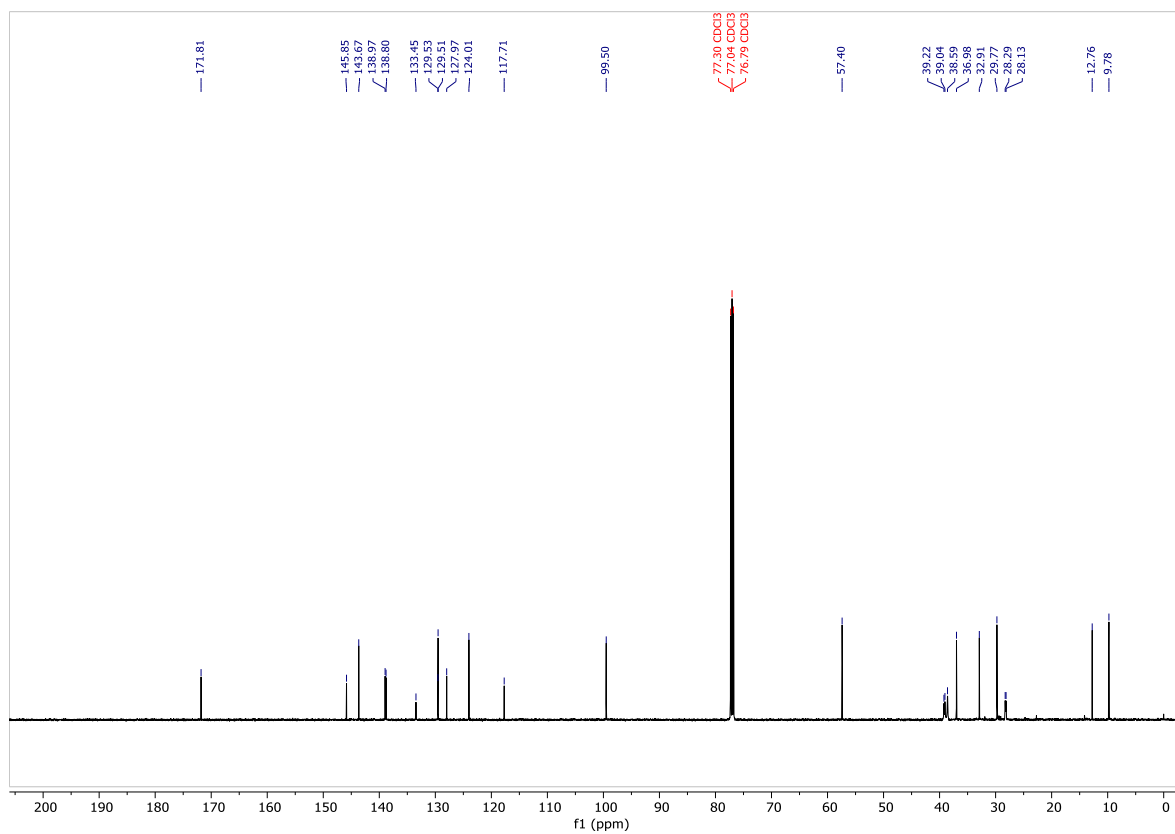



Figure S10. <sup>13</sup>C NMR spectrum of **2**.

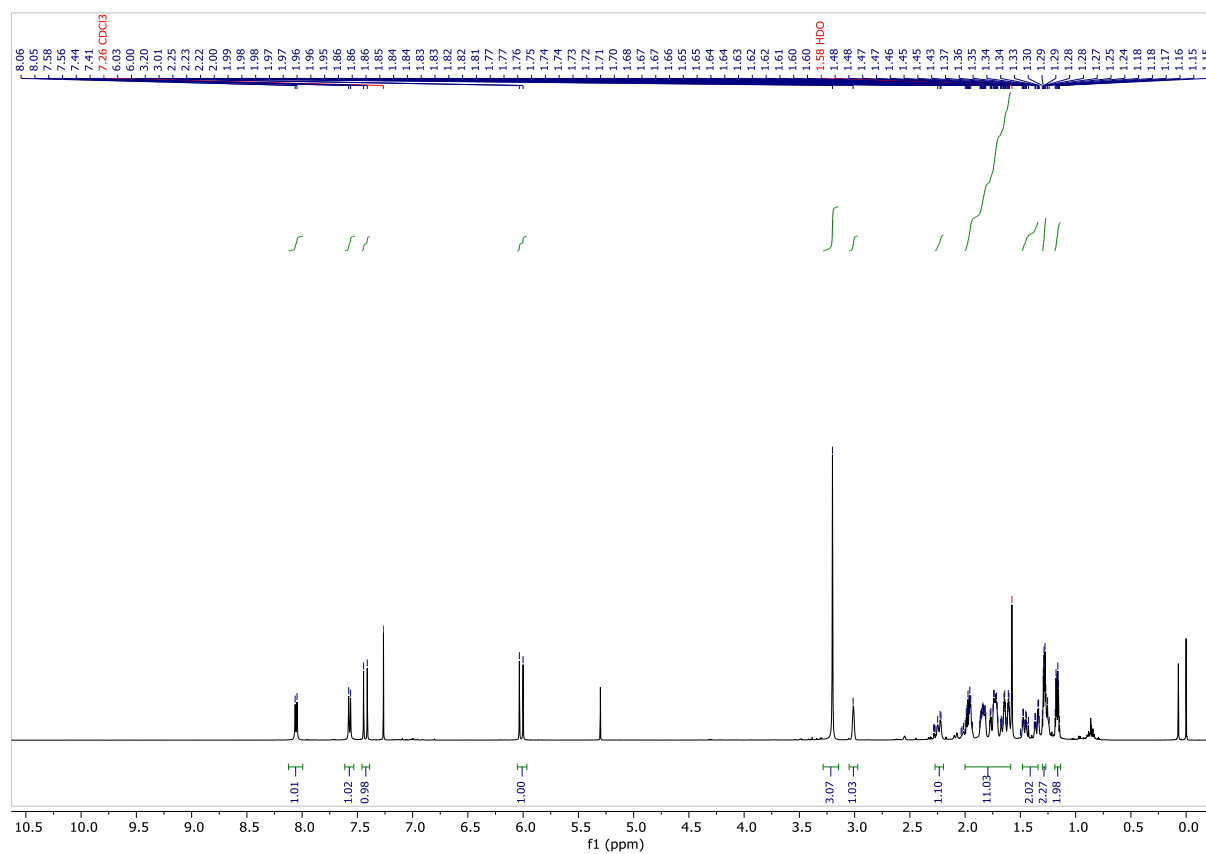

Figure S11. <sup>1</sup>H NMR spectrum of **BCC**.

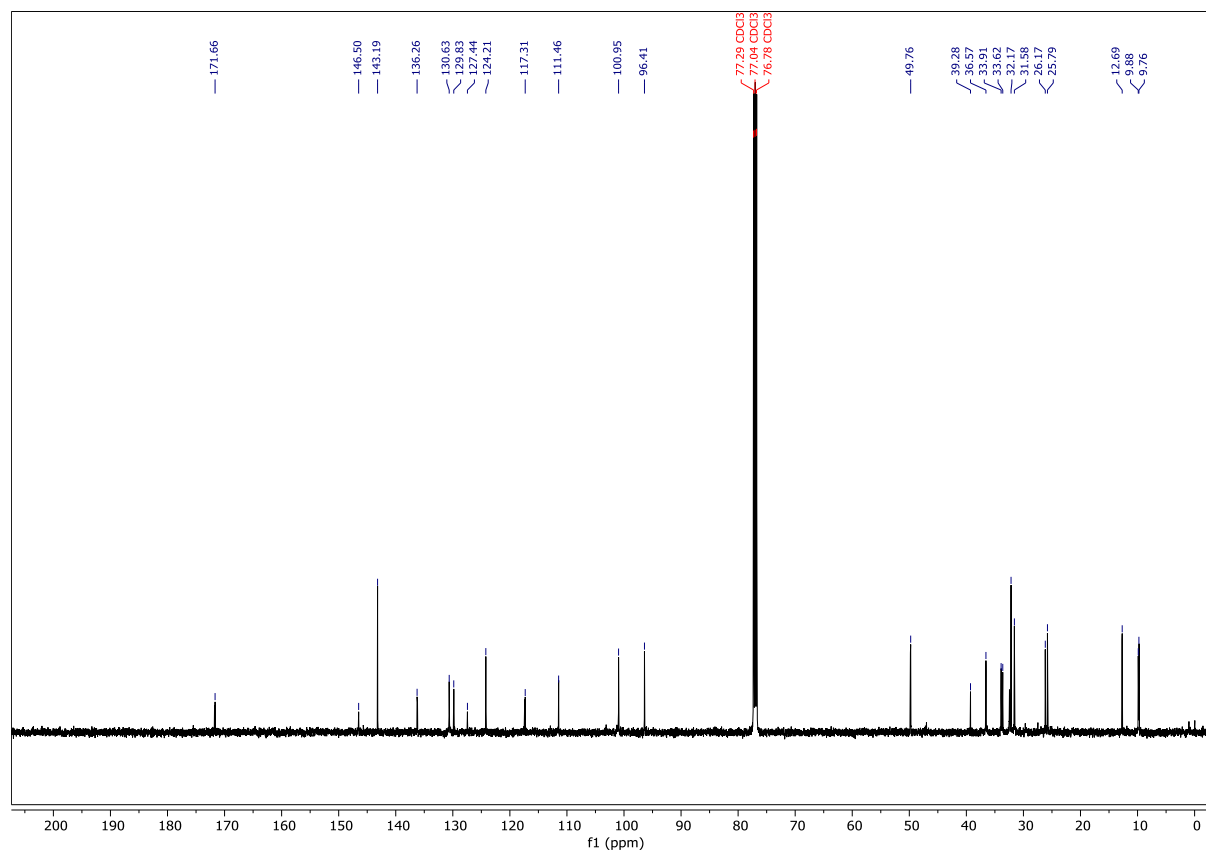

Figure S12.  $^{13}\text{C}$  NMR spectrum of **BCC**.

## 8. Mass Spectra

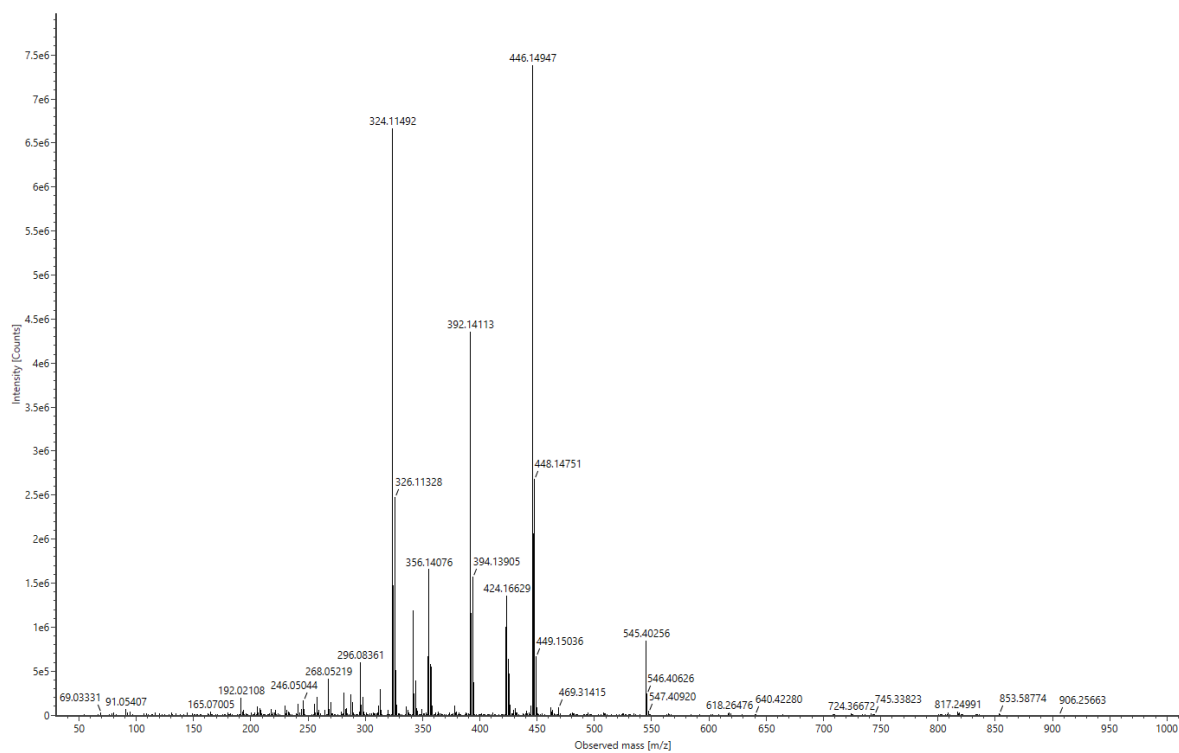

Figure S13. HR-MS spectrum of **2**.
